# Supplementary material
Source: PubMed Central journal article supplement (PMC4132392)
Supplement: supp_127.16.3535_JCS149930.pdf [file supp_127.16.3535_JCS149930.pdf]

1 **Fig. S1. The distributions of tight junction proteins are similar in control and myosin VI**  
2 **KD Caco-2/Bbe cells.** Confocal microscopy/IF was used to examine the tight junction proteins  
3 ZO-1 (a, b), occludin (c, d) and claudin-1 (e, f) in both control cells (a, c, e) and myosin VI KD  
4 cells (b, d, f) respectively (3 independent experiments performed). **Methods:** Caco-2/Bbe cells  
5 were grown on Anapore filters (25 mm, 0.02  $\mu\text{m}$ , Nunc) then infected at 12 days post-confluence  
6 with Ad-HA-NHE3 as described in Methods and Materials. After 48 hours, cells were washed  
7 with ice-cold PBS and fixed for 30 minutes at 4°C with 3% paraformaldehyde (PFA) in PBS.  
8 Fixed cells were blocked and permeabilized with 1% bovine serum albumin (BSA) and 0.075%  
9 saponin in PBS for 1 hour at 4°C. Cells were incubated 1 hour at room temperature with primary  
10 antibodies in 1% BSA-PBS, rinsed in 0.1% BSA-PBS (3 $\times$ 5 min), then incubated with secondary  
11 antibodies in 1% BSA-PBS for 1 h, and rinsed again in 0.1% BSA- PBS (3 $\times$ 5 min). Cells were  
12 rinsed with 0.1% BSA and 0.075% saponin in PBS prior to mounting. Membrane inserts were  
13 detached from wells, placed on glass microscope slides, mounted with Fluorogel (Invitrogen),  
14 and examined with a Zeiss LSM510 confocal microscope. Images were acquired using a 63 $\times$   
15 (1.4 NA) water objective or 100 $\times$  (1.6 NA) oil objective.

16  
17 **Fig. S2. Changes of surface NHE3 amount by dynasore with or without myosin VI**  
18 **knockdown.** (A,B) Immunofluorescence confocal microscopy view of surface NHE3. **Methods:**  
19 Cells were grown on filters for 12 days, then infected with Ad-HA-NHE3 and processed for  
20 immune-staining 48 hrs later. Cells were fixed in 3% PFA for 30 min at 4°C as described above  
21 except that saponin was omitted, and then cells were labeled with anti-mouse HA (Alexa Fluoro  
22 488) and wheat germ agglutinin conjugated to Alexa Fluoro 568 (FI-WGA) to mark the apical  
23 surface. The fluorescence intensity were quantified using Volocity software as described by  
24 Zinchuk (2011). The overlapped intensity of green (NHE3) and red (WGA) was treated as  
25 surface NHE3. Signal intensity was represented as pixels. (C) Measurement of surface NHE3  
26 intensity by Volocity software and statistical analysis of surface NHE3 amount. Compared to  
27 control cells, total intensity of surface NHE3 was significantly increased in dynasore treated  
28 cells, myosin VI KD cells, and dynasore treated myosin VI KD cells ( $P<0.05$ ). However, there is  
29 no significant difference of surface NHE3 between myosin VI KD cells and dynasore treated  
30 myosin VI KD cells. These data show that knocking down myosin VI and dynasore treatment  
31 both increased surface expression of NHE3 and the effects were not additive.

**Fig. S1.**

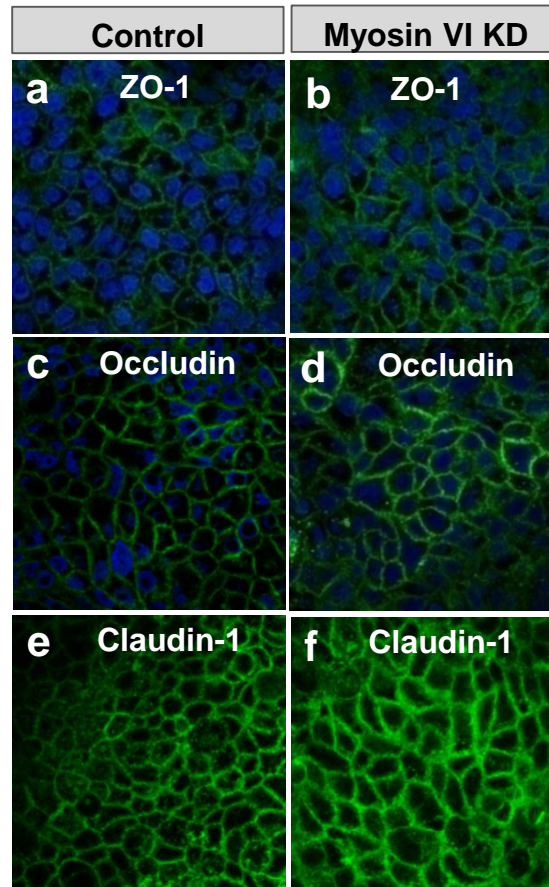

**Fig. S2.**

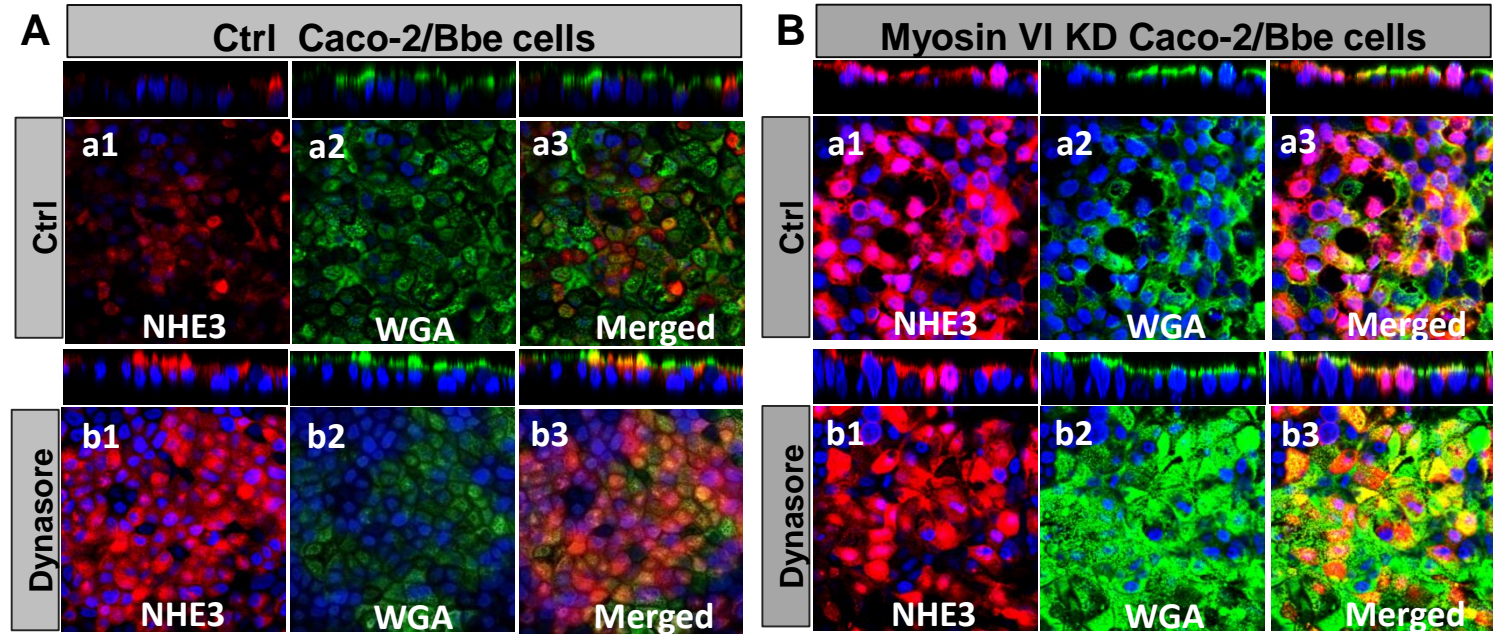

C

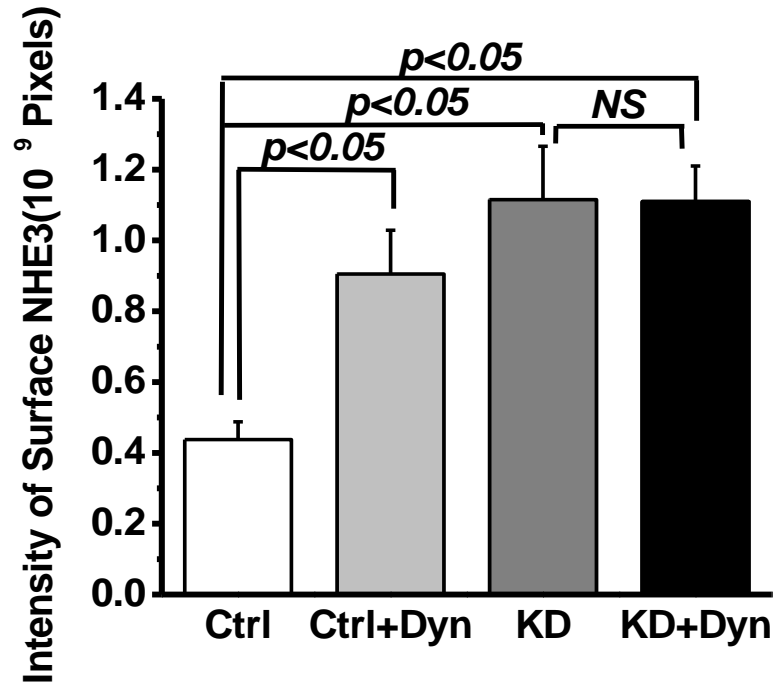

**Table S1: Sequences of myosin VI shRNAs.**

|               | <b>Forward</b>                                                        | <b>Reverse</b>                                                       |
|---------------|-----------------------------------------------------------------------|----------------------------------------------------------------------|
| <b>shRNA1</b> | 5'-CCGGGCAGTGTCTTAGTTTGAATGACTCG<br>AGTCATTCAAAC TAAGACACTGATTTTTG-3' | 5'-ATTCAAAAAGCAGTGTCTTAGTTTGAATG<br>ACTCGAGTCATTCAAAC TAAGACACTGC-3' |
| <b>shRNA2</b> | 5'-GCTCATTCTGCTTCTGTAATGCTCGAG<br>CATTACAGAAGCAGAATGAGCTTTTTG-3'      | 5'-AATTCAAAA GCTCATTCTGCTTCTGTAAT<br>GCTCGAGCATTACAGAAGCAGAATGAGC-3' |
| <b>shRNA3</b> | 5'-CCGG GCAATCCACAGGCAAGAATAACTCG<br>AGTTATTCTTGCCTGTGGATTGCTTTTTG-3' | 5'-AATTCAAAAAGCAATCCACAGGCAAGAAT<br>AACTCGAGTTATTCTTGCCTGTGGATTGC-3' |
